# Supplementary material for: A missense mutation in PMEL17 is associated with the Silver coat color in the horse
Source: Springer Nature journal article supplement (doi:10.1186/1471-2156-7-46), 2006-10-09

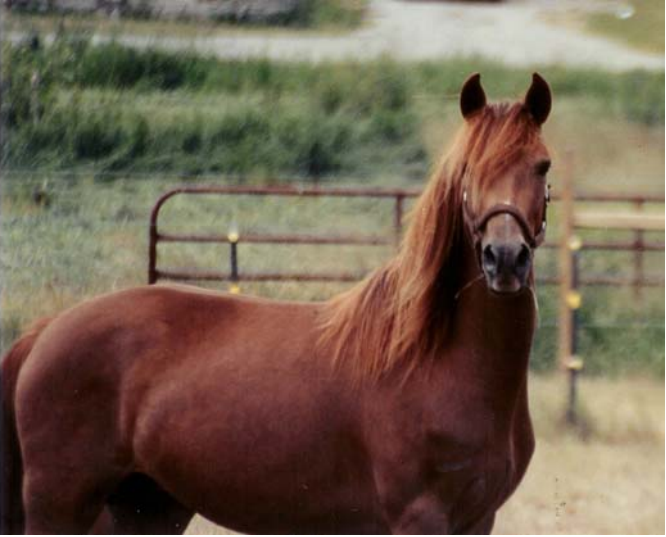

Supplement: 12863_2006_469_MOESM3_ESM.pdf [file 12863_2006_469_MOESM3_ESM.pdf]
